# Supplementary material for: Electrowetting limits electrochemical CO2 reduction in carbon-free gas diffusion electrodes
Source: Energy Adv. 2023 Sep 28;2(11):1893–904. doi: 10.1039/d3ya00285c (PMC10634457; doi:10.1039/d3ya00285c)
Supplement: YA-002-D3YA00285C-s002 [file YA-002-D3YA00285C-s002.xlsx]

## Sheet: Feed stoichiometry
Physical constant
Quantity	Unit	Value	Source	Comment
Ideal gas constant	J / mol / K	8.3145
Faraday's constant	C / mol	96485.3
Normal temperature	K	273.15
Normal pressure	Pa	101325
System parameters
Electrode area	cm^2	3.8
Temperature	°C	20
Gas feed pressure	Pa	140000
CO2 feed	mLn/min	50
Humidifier				Antoine equation, Tosun, İsmail. The thermodynamics of phase and reaction equilibria. Elsevier, 2021
Quantity	Unit	Value		Quantity	Unit	Value
Temperature	°C	20		A	-	11.6834
Vapor pressure	bar (a)	0.0231324		B	-	3816.44
Relative humidity	% r.h.	0.85		C	-	-46.13
Partial pressure	bar (a)	0.0196625		T_min	°C	11
Molar fraction	mol%	0.0140446		T_max	°C	170
H2O vapor flow rate	mLn / min	0.692506		Temperature	°C	20
				Pressure	bar (a)	0.0231324
Feed specifications
Current density	Current	Stoichiometric volumetric flow rate	Lambda_CO2	Lambda_H2O
mA cm-2	A	mLn/min	-
10	0.038	0.264828	188.802	2.61493
50	0.19	1.32414	37.7603	0.522985
100	0.38	2.64828	18.8802	0.261493
200	0.76	5.29656	9.44008	0.130746

## Sheet: Theta
Overview
Fresh samples
Sample	Contact Angle	Sample standard deviation	Standard error
SGL39BC - CFS	149.28	2.5014	1.11866
SGL39BC - MPL	152.88	1.93184	0.863944
SGL39BC - CL	122.86	3.26313	1.45931
Ag 114-1	140.98	2.89344	1.29399
After electrolysis
Sample	Contact angle	Sample standard deviation	Standard error
Ag 114-3 (-200 mA cm-2)	111.12	9.50353	4.25011
Ag 178-1 (-50 mA cm-2)	132.28	5.92636	1.87408
Individual measurements
Carbon-based GDE/GDL (SGL 39 BC )
Fresh sample	File Name	Theta E	Theta	Sample domain	Average theta	Sample standard deviation	Standard error
13	22-09-2020_MPL_un_1.tif	27.6	152.4	MPL	152.88	1.93184	0.863944
14	22_09_2020_MPL_un_2.tif	24.8	155.2	MPL
15	22_09_2020_MPL_un_3.tif	29	151	MPL
17	22_09_2020_MPL_un_4.tif	28.8	151.2	MPL
18	22_09_2020_MPL_un_5.tif	25.4	154.6	MPL
19	22_09_2020_MPS_un_1.tif	27.6	152.4	CFS	149.28	2.5014	1.11866
20	22_09_2020_MPS_un_2.tif	29.1	150.9	CFS
21	22_09_2020_MPS_un_3.tif	32.8	147.2	CFS
22	22_09_2020_MPS_un_4.tif	30.5	149.5	CFS
23	22_09_2020_MPS_un_5.tif	33.6	146.4	CFS
1	15-10-2020-SGL_CL-1.tif	54.4	125.6	CL	122.86	3.26313	1.45931
2	15-10-2020-SGL_CL-2.tif	58.8	121.2	CL
3	15-10-2020-SGL_CL-3.tif	61.1	118.9	CL
4	15-10-2020-SGL_CL-4.tif	53.2	126.8	CL
5	15-10-2020-SGL_CL-5.tif	58.2	121.8	CL
Carbon-free GDE
Sample Ag 114-1 Fresh
#	File Name	Theta E	Theta	Sample domain	Average theta	Sample standard deviation	Standard error
1	27-10-2020_AgSinter_114-1_1.tif	43.7	136.3	Liquid side, Exposed area	140.98	2.89344	1.29399
2	27-10-2020_AgSinter_114-1_2.tif	39.6	140.4	Liquid side, Exposed area
3	27-10-2020_AgSinter_114-1_3.tif	37.4	142.6	Liquid side, Exposed area
4	27-10-2020_AgSinter_114-1_4.tif	38.2	141.8	Liquid side, Exposed area
5	27-10-2020_AgSinter_114-1_5.tif	36.2	143.8	Liquid side, Exposed area
Sample Ag 114-3 Electrolysis at -200 mA cm^-2
#	File Name	Theta E	Theta	Sample domain	Average theta	Sample standard deviation	Standard error
1	Ag 114-3 after run-liquid side-1.tif	54	126	Liquid side, Exposed area	111.12	9.50353	4.25011
2	Ag 114-3 after run-liquid side-2.tif	69.9	110.1	Liquid side, Exposed area
3	Ag 114-3 after run-liquid side-3.tif	69.2	110.8	Liquid side, Exposed area
4	Ag 114-3 after run-liquid side-4.tif	80.5	99.5	Liquid side, Exposed area
5	Ag 114-3 after run-liquid side-5.tif	70.8	109.2	Liquid side, Exposed area
Sample Ag 178-1 after electrolysis at -50 mA cm-2
#	File Name	Theta E	Theta	Sample domain	Average theta	Sample standard deviation	Standard error
1	Ag178-1-liquid_center_1.jpg	43	137	Liquid side, Exposed area	132.28	5.92636	1.87408
2	Ag178-1-liquid_center_2_1.jpg	44	136	Liquid side, Exposed area
3	Ag178-1-liquid_center_3_2.jpg	62	118	Liquid side, Exposed area
4	Ag178-1-liquid_center_4.jpg	44.2	135.8	Liquid side, Exposed area
5	Ag178-1-liquid_center_5.jpg	42.2	137.8	Liquid side, Exposed area
6	Ag178-1-liquid_center_6.jpg	51.8	128.2	Liquid side, Exposed area
7	Ag178-1-liquid_center_7.jpg	49.8	130.2	Liquid side, Exposed area
8	Ag178-1-liquid_center_8.jpg	49.2	130.8	Liquid side, Exposed area
9	Ag178-1-liquid_center_10.jpg	45.2	134.8	Liquid side, Exposed area
10	Ag178-1-liquid_center_11.jpg	45.8	134.2	Liquid side, Exposed area

## Sheet: CO2R Carbon-free GDEs
CO2 electrolysis with Carbon-free GDE GDE Sample Ag 114-2
Flow-by configuration
Figure 3: Averaged values calculated from steady state injection data (highlighted yellow)
Averaged values
i (mA/cm2)		FE CO (%)	error (%)	FE H2 (%)	error (%)	CO label	H2 label	Cathode vs RHE	Error E cathode vs RHE	Cathode vs SHE	Error E cathode vs SHE
-10		77.6211	4.00052	0	0	78 ± 4%		-0.704828	0.00811792	-1.15087	0.00811792
-100		86.8866	7.07548	0	0	87 ± 7%		-1.08368	0.039876	-1.52972	0.039876
-200		35.3812	3.61511	50.4301	3.61511	35 ± 4%	50 ± 4%	-1.70276	0.135904	-2.1488	0.135904
Figure 4: Single injection data
Individual GC injections
GC file name	Date time stamp	Run time start in s after start of recording	Run time in min	Time in s after starting potentiostat	Current density average in mA/cm^2	Current density error in mA/cm^2	Cathode potential average in V vs NHE (uncompensated)	Cathode potential error in V vs NHE (uncompensated)	Cathode potential average in V vs SHE (iR drop compensated)	Cathode potential error in V vs SHE (iR drop compensated)	Cell potential average in V	Cell potential error in V	Gas conversion factor	Mass flow meter corrected flow rate in mLn/min	Mass flow meter corrected flow rate error in mLn/min	CO2 conversion in % (0 to 100)	CO2 conversion error in % (0 to 100)	CO Volumetric concentration in %	H2 Volumetric concentration in %	CO faradaic efficiency in %	CO faradaic efficiency error in %	H2 faradaic efficiency in %	H2 faradaic efficiency error in %	0.5 vol% H2 detection limit as faradaic efficiency in %	pH	Cathode vs RHE	Comment
1 10 mAcm2	20-Jan-2021;14:00:32	215.328	3.58881	192.328	-9.99475	0.00138483	-1.15101	0.000293301	-1.14452	0.000293177	-2.14693	0.00438845	1.02122	83.4836	2.18064	-7.30897	10.1561	0.14187	0	44.746	3.97782	0	0	157.701	7.56	-0.698485
2 10 mAcm2	20-Jan-2021;14:04:08	431.33	7.18883	408.33	-9.99463	0.0015039	-1.15756	0.0137467	-1.15107	0.0137465	-2.1481	0.0127215	1.02182	82.1215	3.41898	-2.41299	13.4839	0.24916	0	77.3041	5.13161	0	0	155.129		-0.705035	Steady state
3 10 mAcm2	20-Jan-2021;14:07:45	648.331	10.8055	625.331	-9.99529	0.000321229	-1.15715	0.00921441	-1.15066	0.00921442	-2.40957	0.0753612	1.02239	80.3528	4.34474	3.24166	16.8351	0.25675	0	77.9382	6.18357	0	0	151.778		-0.704621	Steady state
4 100 mAcm2	20-Jan-2021;14:16:03	1146.33	19.1056	369.334	-100.168	0.0200952	-1.59967	0.0619427	-1.53463	0.0619381	-5.11435	0.0114831	1.03175	83.616	9.9546	3.16905	33.4074	2.6932	0	84.8911	12.2773	0	0	15.7603		-1.08859
5 100 mAcm2	20-Jan-2021;14:19:39	1362.34	22.7056	585.336	-100.157	0.0160512	-1.59471	0.0564895	-1.52968	0.0564882	-5.118	4.44829e-15	1.03201	84.1889	8.66787	1.41218	28.8522	2.7888	0	88.5171	10.7239	0	0	15.8701		-1.08364	Steady state
6 100 mAcm2	20-Jan-2021;14:23:16	1579.34	26.3223	802.337	-100.158	0.0185271	-1.5948	0.0562994	-1.52977	0.056298	-5.118	4.44829e-15	1.03201	82.4878	7.25127	6.38733	25.8256	2.7415	0	85.2562	9.28854	0	0	15.5492		-1.08373	Steady state
7 200 mAcm2	20-Jan-2021;14:30:13	1996.34	33.2723	368.34	-199.895	0.768706	-1.88367	0.0631032	-1.75387	0.0632373	-8.20785	0.112303	1.04295	85.6274	9.78248	7.78637	33.1595	4.8883	0.57246	79.0683	11.8181	9.25955	11.8181	8.08751		-1.30783
8 200 mAcm2	20-Jan-2021;14:33:50	2213.34	36.889	585.341	-199.964	0.0116376	-1.95686	0.113698	-1.82702	0.113694	-8.29864	0.166377	1.0426	86.3935	12.8921	5.61196	42.0954	4.5886	0.80859	74.859	15.2211	13.1914	15.2211	8.15706		-1.38098
10 200 mAcm2	20-Jan-2021;14:59:54	3777.35	62.9559	2149.35	-199.961	0.0189321	-2.28233	0.218001	-2.15249	0.217998	-8.16303	0.128104	1.04006	96.9496	4.35372	-28.9679	12.38	2.0034	2.6694	36.6778	5.4006	48.8708	5.4006	9.15389		-1.70645	Steady state
11 200 mAcm2	20-Jan-2021;15:03:30	3993.35	66.5559	2365.35	-199.964	0.0176007	-2.27496	0.166397	-2.14511	0.166396	-8.21799	0.131957	1.04069	93.3339	3.52643	-17.3401	11.6776	1.9339	2.9498	34.0845	4.82448	51.9895	4.82448	8.81237		-1.69907	Steady state
CO2 electrolysis with Carbon-free GDE Sample Ag 178-1
Flow-by configuration
Figure 4: Single injection data
Individual GC injections
GC file name	GC injection start time stamp	Run time start in s after start of recording	Time in s after potentiostat started current density	Pump liquid flow rate setpoint in mL/min	Liquid pressure average setpoint in mbar	Catholyte liquid pressure average actual in mbar	Catholyte liquid pressure standard deviation actual in mbar	Anolyte liquid pressure average actual in mbar	Anolyte liquid pressure standard deviation actual in mbar	Reactor differential pressure average in mbar (Gas compartment pressure - liquid compartment pressure)	Reactor differential pressure deviation in mbar	Gas feed pressure average in mbar	Gas feed pressure standard deviation in mbar	Gas feed temperature average in Celsius	Gas feed temperature Standard deviation in Celsius	Gas feed humidity average in % relative humidity	Gas feed humidity standard deviation in % relative humidity	Current average in mA	Current error in mA	Current density average in mA/cm^2	Current density error in mA/cm^2	Cathode potential average in V vs SHE (uncompensated)	Cathode potential error in V vs SHE (uncompensated)	Cathode potential average in V vs SHE (iR drop compensated)	Cathode potential error in V vs SHE (iR drop compensated)	Cell potential average in V	Cell potential error in V	Mass flow controller 1 (Feed) flow rate average set point in mLn/min	Mass flow controller 1 (Feed) flow rate set point deviation in mLn/min	Mass flow controller 1 (Feed) flow rate average actual in mLn/min	Mass flow controller 1 (Feed) flow rate deviation actual in mLn/min	Mass flow controller 2 (Purge) flow rate average set point in mLn/min	Mass flow controller 2 (Purge) flow rate set point deviation in mLn/min	Mass flow controller 2 (Purge) flow rate average actual in mLn/min	Mass flow controller 2 (Purge) flow rate standard deviation actual in mLn/min	Mass flow meter uncorrected flow rate average in mLn/min	Mass flow meter uncorrected flow rate standard deviation in mLn/min	Gas conversion factor	Mass flow meter corrected flow rate in mLn/min	Mass flow meter corrected flow rate error in mLn/min	CO2 conversion in % (0 to 100)	CO2 conversion error in % (0 to 100)	CO Volumetric concentration in %	H2 Volumetric concentration in %	CO faradaic efficiency in %	CO faradaic efficiency error in %	H2 faradaic efficiency in %	H2 faradaic efficiency error in %	O2 faradaic efficiency in %
2-10 mA cm-2	17-May-2022;16:57:05	621.505	615.005	20	499.98	500.262	10.9687	0.290901	0.0353319	-17.7438	3.84838	492.635	0.446651	19	0	88	0	-38.008	0.0143525	-10.0021	0.00377697	-1.15156	0.00156844	-1.14507	0.00156819	-2.75263	0.00567499	50	0	50.0011	0.0117334	80	0	80.0019	0.0180939	131.719	2.33449	1.01531	133.736	3.58117	-0.180887	10.4436	0.16166	0.0069267	81.6196	4.02144	3.49718	4.02144	32.9397
3-10 mA cm-2	17-May-2022;17:00:41	837.506	831.006	20	499.98	500.177	11.6439	0.340345	0.022987	-14.3654	5.71795	495.798	3.88356	19	0	88	0	-38.0108	0.0141197	-10.0028	0.0037157	-1.15428	0.0012514	-1.14779	0.00125131	-2.75754	0.00477018	50	0	50.0015	0.00899148	80	0	80.0008	0.011261	130.371	4.8633	1.01534	132.37	5.55672	1.53217	13.5434	0.16588	0.0081117	82.8887	5.15978	4.05334	5.15978	39.8763
4-10 mA cm-2	17-May-2022;17:04:18	1054.51	1048.01	20	499.98	500.236	11.9033	0.367654	0.0178026	-10.3742	4.89064	499.598	1.67359	19	0	88	0	-38.0119	0.0131151	-10.0031	0.00345133	-1.15658	0.00153105	-1.15009	0.00153073	-2.76109	0.00557553	50	0	50.0007	0.00962962	80	0	80.0022	0.0145973	130.836	5.07479	1.01562	132.879	5.74791	0.389355	13.7199	0.16641	0.0087549	83.4707	5.26429	4.39143	5.26429	130.034
5-50 mA cm-2	17-May-2022;17:19:54	1990.51	610.513	20	499.98	500.558	30.9417	0.402987	0.0163996	-23.0371	13.4033	490.067	0.273625	19	0	88	0	-189.816	0.0220099	-49.9515	0.00579209	-1.42523	0.00687069	-1.3928	0.00687057	-4.56441	0.0264285	50	0	49.9978	0.00889202	80	0	79.9997	0.0121075	131.853	3.5275	1.01812	134.242	4.46265	1.30223	11.7372	0.84077	0.01418	85.32	4.47787	1.43896	4.47787	75.8835
6-50 mA cm-2	17-May-2022;17:23:30	2206.51	826.515	20	499.98	500.659	28.0349	0.410321	0.0159344	-20.0669	12.3309	492.905	3.21161	19	0	88	0	-189.817	0.0227345	-49.9517	0.00598277	-1.42408	0.00602815	-1.39164	0.00602785	-4.57931	0.0260052	50	0	49.9993	0.00903969	80	0	79.9998	0.0123997	131.007	5.91654	1.01849	133.429	6.51095	2.16177	15.0958	0.86737	0.0099597	87.486	5.72815	1.00457	5.72815	96.3913
7-50 mA cm-2	17-May-2022;17:27:07	2423.52	1043.52	20	499.98	500.061	29.224	0.409367	0.0149206	-16.2233	12.0093	495.909	1.56793	19	0	88	0	-189.815	0.0217254	-49.9513	0.0057172	-1.42373	0.00454549	-1.39129	0.0045456	-4.59362	0.0246891	50	0	50.0009	0.0077784	80	0	79.9996	0.0139096	131.22	5.4597	1.01872	133.677	6.10134	1.79011	14.36	0.87281	0.013863	88.1991	5.4619	1.40088	5.4619	111.228
8-50 mA cm-2	17-May-2022;17:30:47	2643.52	1263.52	20	499.98	500.803	29.533	0.414907	0.0164449	-16.3824	12.2257	496.855	0.817472	19	0	88	0	-189.816	0.0231304	-49.9516	0.00608695	-1.42344	0.00293208	-1.39101	0.00293158	-4.61633	0.0276536	50	0	50.0005	0.00629123	80	0	80.0008	0.0111592	131.818	4.80867	1.01841	134.245	5.53172	-0.198688	13.236	0.86633	0.011206	87.9157	5.09702	1.13719	5.09702	92.737
9-50 mA cm-2	17-May-2022;17:34:25	2861.52	1481.52	20	499.98	499.748	35.5427	0.421023	0.0171536	-15.7342	13.8065	496.232	1.70557	19	0	88	0	-189.815	0.0214346	-49.9512	0.00564069	-1.42549	0.00944253	-1.39305	0.0094423	-4.62673	0.0298416	50	0	49.9992	0.00762919	80	0	79.999	0.0121497	131.834	6.28266	1.01854	134.278	6.8523	-0.305605	15.362	0.86629	0.015771	87.934	5.91957	1.60086	5.91957	100.607
10-50 mA cm-2	17-May-2022;17:38:01	3077.52	1697.52	20	499.98	500.704	36.7302	0.425474	0.0138579	-15.1598	14.159	496.121	1.64562	19	0	88	0	-189.816	0.023186	-49.9515	0.00610159	-1.4262	0.00619162	-1.39376	0.00619139	-4.63663	0.0286389	50	0	49.9983	0.0105021	80	0	79.9983	0.0154866	131.756	5.76009	1.01817	134.15	6.37504	-0.0187563	14.6101	0.86199	0.012889	87.4137	5.61989	1.30706	5.61989	76.4483
11-50 mA cm-2	17-May-2022;17:58:07	4283.53	2903.53	20	499.98	501.106	32.4175	0.43193	0.0159837	-20.4444	14.3918	490.467	0.294725	19	0	88	0	-189.817	0.024254	-49.9518	0.00638264	-1.46801	0.00831199	-1.43557	0.00831183	-4.75579	0.0293306	50	0	50.0016	0.00842766	80	0	80.0017	0.0129682	132.051	3.86403	1.01821	134.456	4.7358	1.32949	12.1289	0.82096	0.032105	83.4419	4.62667	3.26313	4.62667	84.8953
12-50 mA cm-2	17-May-2022;18:18:16	5492.54	4112.54	20	499.98	499.991	29.6374	0.439659	0.0151452	-17.932	11.8969	491.203	0.374316	19	0	88	0	-189.816	0.0215332	-49.9516	0.00566664	-1.51062	0.00156713	-1.47818	0.00156737	-4.848	0.0264111	50	0	50.0001	0.00768006	80	0	79.9991	0.0109607	131.89	2.31862	1.01803	134.268	3.58463	1.80036	10.5591	0.77326	0.06478	78.4844	4.01594	6.57505	4.01594	74.9097
13-50 mA cm-2	17-May-2022;18:38:23	6699.54	5319.54	20	499.98	500.945	28.7157	0.451973	0.0153279	-2.82561	11.4098	506.442	2.39874	19	0	88	0	-189.819	0.0233049	-49.9523	0.00613287	-1.52805	0.00749149	-1.49561	0.00749155	-4.92257	0.0317752	50	0	50.0006	0.00771075	80	0	80.001	0.0096385	131.358	3.15713	1.01828	133.759	4.1699	2.67229	11.439	0.72934	0.12182	73.745	4.32652	12.3175	4.32652	90.3193
CO2 electrolysis with Carbon-free GDE Sample Ag 114-3
Gas flow-through configuration
Figure S16: Single injection data
Individual GC injections
GC file name	GC injection start time stamp	Run time start in s after start of recording	Run time start in s after potentiostat started	Pump liquid flow rate setpoint in mL/min	Liquid pressure average setpoint in mbar	Catholyte liquid pressure average actual in mbar	Catholyte liquid pressure standard deviation actual in mbar	Anolyte liquid pressure average actual in mbar	Anolyte liquid pressure standard deviation actual in mbar	Reactor differential pressure average in mbar (Gas compartment pressure - liquid compartment pressure)	Reactor differential pressure deviation in mbar	Gas feed pressure average in mbar	Gas feed pressure standard deviation in mbar	Gas feed temperature average in Celsius	Gas feed temperature Standard deviation in Celsius	Gas feed humidity average in % relative humidity	Gas feed humidity standard deviation in % relative humidity	Current average in mA	Current error in mA	Current density average in mA/cm^2	Current density error in mA/cm^2	Cathode potential average in V vs SHE (uncompensated)	Cathode potential error in V vs SHE (uncompensated)	Cathode potential average in V vs SHE (iR drop compensated)	Cathode potential error in V vs SHE (iR drop compensated)	Cell potential average in V	Cell potential error in V	Mass flow controller 1 (Feed) flow rate average set point in mLn/min	Mass flow controller 1 (Feed) flow rate set point deviation in mLn/min	Mass flow controller 1 (Feed) flow rate average actual in mLn/min	Mass flow controller 1 (Feed) flow rate deviation actual in mLn/min	Mass flow controller 2 (Purge) flow rate average set point in mLn/min	Mass flow controller 2 (Purge) flow rate set point deviation in mLn/min	Mass flow controller 2 (Purge) flow rate average actual in mLn/min	Mass flow controller 2 (Purge) flow rate standard deviation actual in mLn/min	Mass flow meter uncorrected flow rate average in mLn/min	Mass flow meter uncorrected flow rate standard deviation in mLn/min	Gas conversion factor	Mass flow meter corrected flow rate in mLn/min	Mass flow meter corrected flow rate error in mLn/min	CO2 conversion in % (0 to 100)	CO2 conversion error in % (0 to 100)	CO Volumetric concentration in %	H2 Volumetric concentration in %	CO faradaic efficiency in %	CO faradaic efficiency error in %	H2 faradaic efficiency in %	H2 faradaic efficiency error in %	0.5 vol% H2 detection limit as faradaic efficiency in %
1-200	27-Jan-2021;18:18:47	176.066	171.066	20	0	117.749	7.53241	117.749	7.53241	46.9002	1.98814	193.07	1.58434	19.0893	0.286437	85	0	-751.985	30.8735	-197.891	8.12461	-2.35551	0.176848	-2.22701	0.175639	-9.10708	0.394197	50	0	49.9997	0.0160269	80	0	79.9982	0.0275588	131.531	1.81873	1.02801	135.215	3.32212	3.69067	10.1214	2.2806	0.8316	58.6908	4.29886	21.4011	4.29886	12.8674
2-200	27-Jan-2021;18:23:50	479.068	474.068	20	0	127.662	10.6296	127.662	10.6296	50.9989	3.05605	207.373	10.0137	19	0	85	0	-758.557	7.40803	-199.62	1.94948	-2.34953	0.222816	-2.21991	0.222799	-8.98398	0.231821	50	0	49.9979	0.0161893	80	0	79.9976	0.028985	128.329	2.0684	1.0296	132.127	3.41771	13.1315	10.6922	2.5767	0.90921	63.5443	3.76242	22.4221	3.76242	12.3306
3-200	27-Jan-2021;18:27:26	695.069	690.069	20	0	149.19	14.7402	149.19	14.7402	57.1241	4.35049	233.804	15.4348	19.0693	0.254235	85	0	-759.969	0.906766	-199.992	0.238623	-2.32895	0.226734	-2.19908	0.22674	-8.94029	0.161027	50	0	49.9989	0.0159915	80	0	79.997	0.0257676	125.258	1.69002	1.03007	129.024	3.14985	17.0416	10.9805	2.509	1.1104	60.9221	3.75129	26.9621	3.75129	12.1407
4-200	27-Jan-2021;18:31:02	911.07	906.07	20	0	173.741	12.8618	173.741	12.8618	66.9882	6.09623	267.836	17.2775	19.2889	0.453877	84.7778	0.416318	-759.917	1.17116	-199.978	0.308199	-2.3029	0.207181	-2.17304	0.207217	-8.87404	0.137402	50	0	50.0008	0.0168498	80	0	79.9999	0.0279813	123.898	1.26657	1.03005	127.622	2.91832	17.2333	10.8478	2.3032	1.2829	55.7605	3.69907	31.059	3.69907	12.105
5-200	27-Jan-2021;18:34:39	1128.07	1123.07	20	0	193.334	9.96695	193.334	9.96695	81.0353	8.29589	301.696	14.9527	19.4111	0.49272	84.175	0.380496	-759.996	0.597229	-199.999	0.157165	-2.27179	0.21833	-2.14192	0.218339	-8.83156	0.126292	50	0	49.9995	0.0157604	80	0	79.9988	0.0282827	124.605	1.45653	1.02725	128	3.00618	12.9938	10.5299	2.0832	2.6078	51.2665	3.70895	64.1767	3.70895	12.3048
6-200	27-Jan-2021;18:38:15	1344.07	1339.07	20	0	205.439	8.81288	205.439	8.81288	95.9507	6.69819	329.29	12.0428	19.3684	0.483046	84	0	-760.008	0.344126	-200.002	0.0905594	-2.22342	0.183631	-2.09355	0.18363	-8.80401	0.115428	50	0	49.9983	0.01663	80	0	80	0.0303436	126.113	1.34358	1.02976	129.866	2.99314	10.7524	10.2801	1.9007	1.6444	47.1388	3.68101	40.7824	3.68101	12.4004
7-200	27-Jan-2021;18:41:52	1561.07	1556.07	20	0	218.381	9.35051	218.381	9.35051	107.408	5.27352	352.585	10.616	19.4044	0.491463	84	0	-760.012	0.0816108	-200.003	0.0214765	-2.19478	0.209362	-2.06491	0.209358	-8.76587	0.104853	50	0	49.9998	0.0152725	80	0	80.0021	0.0304716	126.977	1.20951	1.02979	130.76	2.95224	9.78584	10.3165	1.7471	1.8125	43.5228	3.71967	45.152	3.71967	12.4557
8-200	27-Jan-2021;18:45:28	1777.08	1772.08	20	0	230.495	9.05423	230.495	9.05423	115.743	3.85716	373.512	9.76431	19.3324	0.471731	84	0	-759.933	2.91521	-199.982	0.76716	-2.17447	0.202019	-2.04462	0.202006	-8.74107	0.13014	50	0	50	0.016166	80	0	80.0013	0.0322801	127.338	1.1196	1.03002	131.16	2.92472	8.80762	10.2242	1.605	2.001	40.1625	3.82855	50.0717	3.82855	12.5117
9-200	27-Jan-2021;18:49:05	1994.08	1989.08	20	0	243.571	8.50037	243.571	8.50037	121.91	4.4189	392.716	8.50419	19.4432	0.497454	84	0	-759.901	2.91461	-199.974	0.767003	-2.15091	0.165939	-2.02106	0.165925	-8.65984	0.141834	50	0	49.998	0.0178051	80	0	79.9978	0.0364318	128.182	1.59745	1.02965	131.982	3.15258	4.31988	10.283	1.4707	2.0579	37.4254	3.84802	52.3681	3.84802	12.7237
10-200	27-Jan-2021;18:52:42	2211.08	2206.08	20	0	242.09	9.52059	242.09	9.52059	133.431	8.43514	404.05	2.84562	19.6399	0.480699	84	0	-759.979	0.0884808	-199.994	0.0232844	-2.14597	0.1724	-2.0161	0.172397	-8.66163	0.109027	50	0	49.9985	0.0151956	80	0	79.9977	0.0344444	130.828	3.25502	1.02935	134.667	4.27566	4.21222	9.88996	1.3058	2.1529	33.1616	3.70402	54.6742	3.70402	12.6978
11-200	27-Jan-2021;18:56:19	2428.08	2423.08	20	0	245.77	9.87334	245.77	9.87334	136.954	4.24342	411.026	5.55961	19.8892	0.314324	84	0	-759.969	0.0917325	-199.992	0.0241401	-2.1361	0.17032	-2.00623	0.170317	-8.65042	0.106747	50	0	50.0005	0.015363	80	0	79.9995	0.0325805	130.551	1.52902	1.02957	134.412	3.16199	3.17116	9.92976	1.2023	2.3315	30.7157	3.74387	59.5639	3.74387	12.7737
12-200	27-Jan-2021;18:59:54	2643.08	2638.08	20	0	235.27	28.4691	235.27	28.4691	150.96	21.4069	415.562	7.87952	19.9723	0.164342	84	0	-759.949	0.09079	-199.987	0.0238921	-2.10715	0.13779	-1.97729	0.137788	-8.62436	0.0898287	50	0	50.0007	0.0149556	80	0	80.0018	0.031984	135.439	9.59253	1.02809	139.243	10.0107	-18.0015	8.95599	1	3.12	27.5393	3.80157	85.9226	3.80157	13.7696
13-200	27-Jan-2021;19:03:32	2861.08	2856.08	20	0	202.556	19.0605	202.556	19.0605	169.948	12.7251	402.847	8.99105	20	0	84	0	-759.952	0.0927163	-199.987	0.024399	-2.10607	0.125787	-1.97621	0.125784	-8.64229	0.0995937	50	0	49.9995	0.0157589	80	0	80.001	0.0287325	137.377	8.77162	1.02927	141.398	9.24195	2.89915	9.85833	0.97713	2.4569	24.9875	3.72348	62.8288	3.72348	12.7862
14-200	27-Jan-2021;19:07:08	3077.08	3072.08	20	0	219.513	15.7386	219.513	15.7386	157.351	6.55521	404.881	6.85433	20	0	84	0	-759.96	0.0910302	-199.99	0.0239553	-2.10238	0.133717	-1.97252	0.133714	-8.65042	0.11227	50	0	49.9989	0.0167137	80	0	79.9975	0.0307909	130.802	1.83561	1.02961	134.675	3.32573	4.62168	10.1716	0.93243	2.6218	23.7029	3.79906	66.6477	3.79906	12.7103
15-200	27-Jan-2021;19:10:45	3294.09	3289.09	20	0	235.574	6.7997	235.574	6.7997	155.051	4.45744	418.491	5.85661	20	0	84	0	-759.962	0.0903783	-199.99	0.0237838	-2.09734	0.117259	-1.96747	0.117256	-8.65355	0.11385	50	0	49.9998	0.0184567	80	0	79.9986	0.0336296	130.706	1.83939	1.02963	134.579	3.32621	-1.49564	10.039	0.91544	2.6255	23.8044	3.89675	68.2716	3.89675	13.0016
16-200	27-Jan-2021;19:14:21	3510.09	3505.09	20	0	235.122	7.33302	235.122	7.33302	161.928	4.49258	426.03	2.32995	20	0	84	0	-759.964	0.0902398	-199.991	0.0237473	-2.09029	0.107873	-1.96043	0.10787	-8.66946	0.106449	50	0	50.0024	0.0176911	80	0	80.0006	0.0325224	131.934	1.96392	1.02952	135.828	3.41742	3.40659	9.86676	0.88086	2.6383	22.4868	3.71466	67.3512	3.71466	12.7641
17-200	27-Jan-2021;19:17:58	3727.09	3722.09	20	0	239.316	8.21694	239.316	8.21694	164.012	3.91017	431.819	3.62592	19.775	0.418164	83.9972	0.0527046	-759.968	0.111954	-199.992	0.0294616	-2.08205	0.106021	-1.95219	0.106019	-8.67902	0.10767	50	0	50.0034	0.0156244	80	0	80.001	0.0302389	131.432	1.81821	1.02954	135.315	3.32701	4.50584	10.0493	0.85486	2.6488	21.7166	3.75627	67.2893	3.75627	12.7018
18-200	27-Jan-2021;19:21:35	3944.09	3939.09	20	0	242.79	8.12708	242.79	8.12708	168.117	5.1505	439.408	3.96104	19.1745	0.380079	83.41	0.492511	-759.963	0.111812	-199.99	0.0294241	-2.06344	0.104477	-1.93357	0.104475	-8.66444	0.109939	50	0	50.0003	0.0151631	80	0	79.9984	0.0304836	131.854	2.06796	1.03026	135.844	3.48015	-1.15027	9.99743	0.82655	3.7864	21.4471	3.87253	98.2485	3.87253	12.9739
19-200	27-Jan-2021;19:25:12	4161.09	4156.09	20	0	246.542	8.09881	246.542	8.09881	172.221	3.28312	447.211	4.31297	19	0	83	0	-759.956	0.0906416	-199.988	0.0238531	-2.04243	0.100246	-1.91257	0.100243	-8.64391	0.106659	50	0	50.0003	0.0174471	80	0	79.9982	0.0332576	131.75	1.57989	1.0294	135.624	3.20821	1.44877	9.90119	0.79178	2.6716	20.3437	3.77419	68.643	3.77419	12.8468
20-200	27-Jan-2021;19:28:53	4382.09	4377.09	20	0	250.247	8.08402	250.247	8.08402	177.628	5.64173	456.036	3.71037	19	0	83	0	-759.955	0.0884027	-199.988	0.0232639	-2.04019	0.101455	-1.91033	0.101453	-8.63742	0.10218	50	0	50.0004	0.0152349	80	0	80.0002	0.0329243	132.069	2.19038	1.02936	135.946	3.55398	-0.370811	10.7596	0.77394	2.7048	20.0291	4.1479	69.9986	4.1479	12.9397
21-200	27-Jan-2021;19:32:30	4599.09	4594.09	20	0	247.635	8.45736	247.635	8.45736	185.395	5.2614	461.898	2.2038	19.0139	0.117032	83	0	-759.959	0.0880053	-199.989	0.0231593	-2.03317	0.0992247	-1.90331	0.099222	-8.62456	0.0992407	50	0	50.0002	0.013807	80	0	80.0009	0.028515	133.237	2.88064	1.02917	137.124	4.03292	-5.98896	10.6689	0.7783	2.6382	20.586	4.25121	69.7804	4.25121	13.225
22-200	27-Jan-2021;19:36:06	4815.1	4810.1	20	0	238.009	10.4261	238.009	10.4261	194.252	6.54206	461.786	2.14015	19.2078	0.406264	83	0	-759.965	0.0888497	-199.991	0.0233815	-2.02747	0.0968536	-1.8976	0.0968522	-8.63017	0.101642	50	0	50.0001	0.0120714	80	0	79.9989	0.0273927	134.442	2.88799	1.02922	138.37	4.05623	-1.0952	9.82651	0.75775	2.6819	19.6618	3.80503	69.5888	3.80503	12.9738
23-200	27-Jan-2021;19:39:43	5032.1	5027.1	20	0	237.678	7.95921	237.678	7.95921	194.418	4.08466	461.656	2.08179	19.6537	0.476438	83	0	-759.97	0.0899141	-199.992	0.0236616	-2.02348	0.0950467	-1.89362	0.0950467	-8.63653	0.103227	50	0	49.9995	0.013091	80	0	79.9977	0.0315725	133.291	1.83868	1.02827	137.059	3.36536	-4.24834	10.2866	0.75936	3.1267	19.9499	4.0579	82.1447	4.0579	13.136
[truncated: 5 more columns]

## Sheet: Ag 114-3 XPS Depth profile
										Labels
										Fresh sample
										After electrolysis
										Alternative labels
										> -1.4 V vs. RHE
Relative concentration in at% within layer									Normalized by depth
At%									Normalized area
Depth in nm (vs. Ta2O5)	Time s	Area Ag	Area F	Area C	Area Ag	Area F	Area C		Depth in nm (vs. Ta2O5)	Time s	Area Ag	Area F	Area C	Area Ag	Area F	Area C
		fresh	fresh	fresh	spent liquid	spent liquid	spent liquid				fresh	fresh	fresh	spent liquid	spent liquid	spent liquid
0	0	0.03076	0.6259	0.34334	0.1002	0.47995	0.41984		0	0	0.34666	1	1	0.51395	1	1
0.1	10	0.04028	0.62588	0.33384	0.14211	0.47667	0.38122		0.1	10	0.44361	0.97724	0.95022	0.71522	0.97454	0.89098
0.2	20	0.04774	0.61172	0.34054	0.15571	0.47374	0.37054		0.2	20	0.51549	0.9365	0.9504	0.77498	0.95781	0.85642
0.3	30	0.05261	0.60566	0.34173	0.16161	0.45754	0.38085		0.3	30	0.55514	0.90615	0.93204	0.81363	0.93578	0.89044
0.4	40	0.058	0.60839	0.33361	0.16962	0.46299	0.36739		0.4	40	0.59718	0.8881	0.88778	0.8315	0.92198	0.83635
0.5	50	0.06265	0.59689	0.34046	0.17669	0.45149	0.37182		0.5	50	0.64706	0.87408	0.90889	0.85298	0.88543	0.8336
0.6	60	0.06839	0.58855	0.34306	0.17721	0.4475	0.3753		0.6	60	0.70357	0.85842	0.91216	0.86881	0.89127	0.85449
0.7	70	0.07288	0.58846	0.33866	0.17861	0.44188	0.37951		0.7	70	0.73512	0.84152	0.88287	0.87527	0.87966	0.86368
0.80001	80.001	0.078	0.58771	0.33429	0.18762	0.44876	0.36363		0.80001	80.001	0.76651	0.81887	0.84912	0.89409	0.86875	0.80473
0.90001	90.001	0.08087	0.5763	0.34284	0.19338	0.43659	0.37002		0.90001	90.001	0.79773	0.80606	0.87416	0.92091	0.8446	0.8183
1.00006	100.006	0.083	0.57145	0.34555	0.19003	0.42128	0.38868		1.00006	100.006	0.81711	0.79765	0.87929	0.91893	0.82756	0.87284
1.10006	110.006	0.08733	0.56619	0.34647	0.19495	0.42786	0.3772		1.10006	110.006	0.83968	0.77183	0.86101	0.92309	0.82301	0.82944
1.20006	120.006	0.08897	0.57203	0.33901	0.19846	0.42713	0.37441		1.20006	120.006	0.86474	0.78833	0.8517	0.94157	0.8232	0.82491
1.30006	130.006	0.0919	0.56927	0.33883	0.19914	0.4244	0.37646		1.30006	130.006	0.88614	0.77828	0.84445	0.94872	0.82135	0.83289
1.40006	140.006	0.09576	0.56004	0.34421	0.19982	0.419	0.38118		1.40006	140.006	0.91243	0.75661	0.84773	0.95774	0.81581	0.84843
1.50009	150.009	0.09702	0.55805	0.34493	0.20655	0.4161	0.37735		1.50009	150.009	0.91968	0.75005	0.84515	0.97054	0.79428	0.82343
1.60009	160.009	0.10116	0.55527	0.34357	0.20674	0.41388	0.37937		1.60009	160.009	0.93536	0.72795	0.8211	0.9675	0.78682	0.82447
1.70009	170.009	0.10401	0.5581	0.33789	0.21015	0.41991	0.36994		1.70009	170.009	0.96041	0.7307	0.80647	0.98465	0.79926	0.80495
1.80009	180.009	0.10609	0.55283	0.34108	0.21269	0.41257	0.37473		1.80009	180.009	0.98008	0.7241	0.81442	0.99836	0.7867	0.81685
1.90009	190.009	0.10804	0.5501	0.34186	0.21539	0.40864	0.37597		1.90009	190.009	1	0.72192	0.81786	1	0.7707	0.8106
At% (*100)
Depth in nm (vs. Ta2O5)	Time s	Area Ag	Area F	Area C	Area Ag	Area F	Area C		Normalized by maximum concentration		Ag	F	C	Ag	F	C
		fresh	fresh	fresh	spent liquid	spent liquid	spent liquid		Depth in nm (vs. Ta2O5)	Time s	Fresh	Fresh	Fresh	Spent	Spent	Spent
0	0	3.076	62.59	34.334	10.02	47.995	41.984		0	0	34.666	100	100	51.395	100	100
0.1	10	4.028	62.588	33.384	14.211	47.667	38.122		0.1	10	44.361	97.724	95.022	71.522	97.454	89.098
0.2	20	4.774	61.172	34.054	15.571	47.374	37.054		0.2	20	51.549	93.65	95.04	77.498	95.781	85.642
0.3	30	5.261	60.566	34.173	16.161	45.754	38.085		0.3	30	55.514	90.615	93.204	81.363	93.578	89.044
0.4	40	5.8	60.839	33.361	16.962	46.299	36.739		0.4	40	59.718	88.81	88.778	83.15	92.198	83.635
0.5	50	6.265	59.689	34.046	17.669	45.149	37.182		0.5	50	64.706	87.408	90.889	85.298	88.543	83.36
0.6	60	6.839	58.855	34.306	17.721	44.75	37.53		0.6	60	70.357	85.842	91.216	86.881	89.127	85.449
0.7	70	7.288	58.846	33.866	17.861	44.188	37.951		0.7	70	73.512	84.152	88.287	87.527	87.966	86.368
0.80001	80.001	7.8	58.771	33.429	18.762	44.876	36.363		0.80001	80.001	76.651	81.887	84.912	89.409	86.875	80.473
0.90001	90.001	8.087	57.63	34.284	19.338	43.659	37.002		0.90001	90.001	79.773	80.606	87.416	92.091	84.46	81.83
1.00006	100.006	8.3	57.145	34.555	19.003	42.128	38.868		1.00006	100.006	81.711	79.765	87.929	91.893	82.756	87.284
1.10006	110.006	8.733	56.619	34.647	19.495	42.786	37.72		1.10006	110.006	83.968	77.183	86.101	92.309	82.301	82.944
1.20006	120.006	8.897	57.203	33.901	19.846	42.713	37.441		1.20006	120.006	86.474	78.833	85.17	94.157	82.32	82.491
1.30006	130.006	9.19	56.927	33.883	19.914	42.44	37.646		1.30006	130.006	88.614	77.828	84.445	94.872	82.135	83.289
1.40006	140.006	9.576	56.004	34.421	19.982	41.9	38.118		1.40006	140.006	91.243	75.661	84.773	95.774	81.581	84.843
1.50009	150.009	9.702	55.805	34.493	20.655	41.61	37.735		1.50009	150.009	91.968	75.005	84.515	97.054	79.428	82.343
1.60009	160.009	10.116	55.527	34.357	20.674	41.388	37.937		1.60009	160.009	93.536	72.795	82.11	96.75	78.682	82.447
1.70009	170.009	10.401	55.81	33.789	21.015	41.991	36.994		1.70009	170.009	96.041	73.07	80.647	98.465	79.926	80.495
1.80009	180.009	10.609	55.283	34.108	21.269	41.257	37.473		1.80009	180.009	98.008	72.41	81.442	99.836	78.67	81.685
1.90009	190.009	10.804	55.01	34.186	21.539	40.864	37.597		1.90009	190.009	100	72.192	81.786	100	77.07	81.06

## Sheet: Ag 114-3 XPS composition
Individual measurement of three sample locations							Elemental surface composition (corrected for Iodine contamination)							Carbon bonds
Fresh sample								Fresh sample		Liquid side of used sample		Comment		Fresh sample
Sample Identifier	Name	Area / (T*MFP)	Area/(RSF*T*MFP)	%At Conc	Atomic composition in % corrected for Iodine contamination from previous samples		Ag%	3.76772	0.0799669	3.66346	1.03605			Individual measurement of three sample locations
114-3-unused_001	C 1s	954886	954885	35.96	36.261		C%	36.2851	0.700591	48.7095	1.85935	Carbon is present in PTFE, but could also be a residue of the cellulose pore forming agent		Sample Identifier	Name	Position	FWHM	Area / (T*MFP)	Area/(RSF*T*MFP)	%At Conc			CF/C total %
114-3-unused_001	O 1s	106676	36408.3	1.37	1.38147		F%	57.7573	0.835968	40.1248	1.87666	Fluorine is present in PTFE		114-3-unused_001	CR	284.79	1.42	15240.9	15240.9	13.08				Fresh sample	Liquid side of used sample
114-3-unused_001	Ag 3d	1.83123e+06	101509	3.82	3.85197		Cu%	n.a.	n.a.	0.212027	0.0891288	Copper contamination from current collector			COR	286.12	1.75	1303.48	1303.48	1.12			Sample 1	0.838723	0.477854
114-3-unused_001	F 1s	6.70807e+06	1514240	57.02	57.4972		O%	1.23793	0.132611	5.8229	0.772706				CO	287.79	1.42	600.19	600.193	0.52			Sample 2	0.867879	0.435732
114-3-unused_001	I 3d 5/2	438641	22075.5	0.83	0.836947		Ca%	0.444078	0.0507748	0.0547096	0.00711004				COOR	289.02	1.75	1648.99	1648.99	1.42			Sample 3	0.812813	0.44054
114-3-unused_001	Ca 2p	59382.3	11712.5	0.44	0.443683		S%	0.279186	0.0505362	n/a	n.a.				CF	292.06	1.21	97735.9	97735.9	83.87			Average	0.839805	0.451375
114-3-unused_001	S 2p	14507.5	8650.89	0.33	0.332762		Si%	n.a.	n.a.	0.775071	0.0835823			114-3-unused_002	CR	284.82	1.46	11413.1	11413.1	10.15			Standard error	0.0159054	0.013312
114-3-unused_001	Cl2p	14345.5	6278.11	0.24	0.242009		Cl%	0.232114	0.00987086	n/a	n.a.				COR	286.5	1.75	1089.71	1089.71	0.97
114-3-unused_002	C 1s	924477	924477	35.28	35.5968		K%			0.659021	0.175687				CO	287.82	1.46	485.4	485.398	0.43			COX/C total %
114-3-unused_002	O 1s	85370.1	29136.6	1.11	1.11997										COOR	289.02	1.75	1865.37	1865.37	1.66				Fresh sample	Liquid side of used sample
114-3-unused_002	Ag 3d	1.72876e+06	95829.5	3.66	3.69287										CF	292.02	1.21	97570.4	97570.4	86.79			Sample 1	0.0304872	0.0636408
114-3-unused_002	F 1s	6.75287e+06	1524350	58.17	58.6924									114-3-unused_003	CR	284.79	1.4	14725.2	14725.2	14.32			Sample 2	0.0306027	0.064254
114-3-unused_002	I 3d 5/2	462583	23280.5	0.89	0.897992										COR	286.12	1.75	2075.11	2075.11	2.02			Sample 3	0.0439802	0.0779055
114-3-unused_002	Ca 2p	51604.5	10178.4	0.39	0.393502										CO	287.79	1.4	477.22	477.217	0.46			Average	0.0350234	0.0686001
114-3-unused_002	S 2p	12027.2	7171.88	0.27	0.272425										COOR	289.02	1.75	1969.92	1969.92	1.92			Standard error	0.00447855	0.00465607
114-3-unused_002	Cl2p	13685.2	5989.13	0.23	0.232065										CF	292.09	1.28	83577.1	83577.1	81.28
114-3-unused_003	C 1s	863664	863664	36.62	36.9974																		CR/C total %
114-3-unused_003	O 1s	83177.1	28388.1	1.2	1.21237									Liquid side of used sample										Fresh sample	Liquid side of used sample
114-3-unused_003	Ag 3d	1.58142e+06	87662	3.72	3.75834									Sample Identifier	Name	Position	FWHM	Area / (T*MFP)	Area/(RSF*T*MFP)	%At Conc			Sample 1	0.13079	0.458505
114-3-unused_003	F 1s	5.90215e+06	1332310	56.5	57.0822									114-3-noCu side_001	CR	284.8	1.38	55548.2	55548.2	44.89			Sample 2	0.101518	0.500014
114-3-unused_003	I 3d 5/2	479858	24149.9	1.02	1.03051										COR	286.52	1.35	4217.72	4217.72	3.41			Sample 3	0.143207	0.481555
114-3-unused_003	Ca 2p	58682.2	11574.4	0.49	0.49505										CO	287.8	1.38	1270.13	1270.13	1.03			Average	0.125172	0.480025
114-3-unused_003	S 2p	9074.9	5411.38	0.23	0.23237										COOR	288.63	1.47	2222.27	2222.27	1.8			Standard error	0.012358	0.0120071
114-3-unused_003	Cl2p	11611.9	5081.8	0.22	0.222267										CF	291.97	1.31	57892.3	57892.3	46.79
															K2p 3/2	292.78	1.38	6850.74	1725.63	1.39
Liquid side of used sample															K2p 1/2	295.58	1.38	3425.09	862.743	0.7
Sample Identifier	Name	Area / (T*MFP)	Area/(RSF*T*MFP)	%At Conc	Atomic composition in % corrected for Iodine contamination from previous samples									114-3-noCu side_002	CR	284.8	1.4	61451.4	61451.4	48.77
114-3-noCu side_001	C 1s	1.04374e+06	1043740	46.89	46.5918										COR	286.52	1.35	4692.03	4692.03	3.72
114-3-noCu side_001	O 1s	360162	122922	5.52	5.4849										CO	287.8	1.4	1090.18	1090.18	0.87
114-3-noCu side_001	Ag 3d	1.9506e+06	108126	4.86	4.82909										COOR	288.77	1.48	2114.56	2114.56	1.68
114-3-noCu side_001	F 1s	4.11479e+06	928847	41.73	41.4646										CF	292.03	1.35	53551.1	53551.1	42.5
114-3-noCu side_001	I 3d 5/2	24571.3	1236.6	0.06											K2p 3/2	292.85	1.26	8201.84	2065.96	1.64
114-3-noCu side_001	Ca 2p	5711.7	1126.57	0.05	0.049682										K2p 1/2	295.65	1.26	4100.59	1032.89	0.82
114-3-noCu side_001	Si 2s	16880.2	17675.6	0.79	0.784976									114-3-noCu side_003	CR	284.8	1.44	65359.1	65359.1	47.48
114-3-noCu side_001	Cu2p 1/2	20831.6	2405.49	0.11	0.1093										COR	286.12	1.75	7349.73	7349.73	5.34
114-3-noCu side_001	K2p 1/2	3425.09	862.743	0.7	0.695548										CO	287.8	1.44	2094.52	2094.52	1.52
114-3-noCu side_002	C 1s	1.09485e+06	1094850	50.47	50.0744										COOR	288.99	1.35	1129.48	1129.48	0.82
114-3-noCu side_002	O 1s	429633	146632	6.76	6.70701										CF	292.13	1.11	59792.3	59792.3	43.44
114-3-noCu side_002	Ag 3d	1.30835e+06	72524.8	3.34	3.31382										K2p 3/2	293.09	1.24	5113.97	1288.15	0.94
114-3-noCu side_002	F 1s	3.67819e+06	830291	38.28	37.98										K2p 1/2	295.89	1.24	2556.78	644.025	0.47
114-3-noCu side_002	I 3d 5/2	12430.1	625.57	0.03
114-3-noCu side_002	Si 2s	17916.9	18761.1	0.86	0.853259
114-3-noCu side_002	Cu2p 1/2	47935.3	5535.25	0.26	0.257962
114-3-noCu side_002	K2p 1/2	4100.59	1032.89	0.82	0.813573
114-3-noCu side_003	C 1s	1.1318e+06	1131800	49.68	49.4624
114-3-noCu side_003	O 1s	353587	120678	5.3	5.27678
114-3-noCu side_003	Ag 3d	1174492	65104.9	2.86	2.84747
114-3-noCu side_003	F 1s	4.14934e+06	936645	41.11	40.9299
114-3-noCu side_003	I 3d 5/2	14984.7	754.139	0.03	0.0298686
114-3-noCu side_003	Ca 2p	7289.5	1437.77	0.06	0.0597372
114-3-noCu side_003	Si 2s	15043.7	15752.5	0.69	0.686977
114-3-noCu side_003	Cu2p 1/2	52960.8	6115.56	0.27	0.268817
114-3-noCu side_003	K2p 1/2	2556.78	644.025	0.47	0.467941

## Sheet: Ag 178-1 XPS Depth profile
										Labels
										Under gasket
										-1.0 V vs. RHE
Relative concentration in at% within layer
At%
Depth in nm (vs. Ta2O5)	Time s	Area Ag	Area F	Area C	Area Ag	Area F	Area C
		under gasket, liquid	under gasket, liquid	under gasket, liquid	exposed, liquid	exposed, liquid	exposed, liquid
0	0	0.0366058	0.557645	0.405749	0.0411012	0.576629	0.38227
0.1	10	0.0388416	0.568774	0.392384	0.0407946	0.563021	0.396184
0.2	20	0.0390829	0.559817	0.4011	0.0415608	0.566663	0.391776
0.3	30	0.0391102	0.564775	0.396114	0.042049	0.562451	0.3955
0.4	40	0.0402551	0.564663	0.395082	0.0441159	0.577199	0.378685
0.5	50	0.0408342	0.56486	0.394306	0.04291	0.561147	0.395943
0.6	60	0.0411935	0.561463	0.397344	0.0445237	0.564228	0.391248
0.7	70	0.0411976	0.555036	0.403767	0.0445201	0.562226	0.393254
0.80001	80.001	0.043493	0.57282	0.383687	0.0447753	0.563319	0.391905
0.90001	90.001	0.0425566	0.555556	0.401888	0.0446478	0.561739	0.393613
1.00006	100.006	0.0428491	0.56047	0.396681	0.0452589	0.561845	0.392896
1.10006	110.006	0.0438335	0.557714	0.398452	0.0453475	0.557854	0.396798
1.20006	120.006	0.04378	0.563675	0.392545	0.0456286	0.567057	0.387315
1.30006	130.006	0.0426875	0.541161	0.416151	0.0454574	0.556774	0.397768
1.40006	140.006	0.0443721	0.553172	0.402456	0.0456193	0.552543	0.401837
1.50009	150.009	0.0445884	0.549136	0.406276	0.0456444	0.557906	0.396449
1.60009	160.009	0.0447022	0.551901	0.403397	0.0465899	0.555831	0.397579
1.70009	170.009	0.0450169	0.545702	0.409281	0.0466551	0.562385	0.39096
1.80009	180.009	0.045355	0.546997	0.407648	0.0473644	0.564522	0.388114
1.90009	190.009	0.0447237	0.538144	0.417133	0.046949	0.557681	0.39537
At% (*100)
Depth in nm (vs. Ta2O5)	Time s	Area Ag	Area F	Area C	Area Ag	Area F	Area C
		fresh	fresh	fresh	spent liquid	spent liquid	spent liquid
0	0	3.66058	55.7645	40.5749	4.11012	57.6629	38.227
0.1	10	3.88416	56.8774	39.2384	4.07946	56.3021	39.6184
0.2	20	3.90829	55.9817	40.11	4.15608	56.6663	39.1776
0.3	30	3.91102	56.4775	39.6114	4.2049	56.2451	39.55
0.4	40	4.02551	56.4663	39.5082	4.41159	57.7199	37.8685
0.5	50	4.08342	56.486	39.4306	4.291	56.1147	39.5943
0.6	60	4.11935	56.1463	39.7344	4.45237	56.4228	39.1248
0.7	70	4.11976	55.5036	40.3767	4.45201	56.2226	39.3254
0.80001	80.001	4.3493	57.282	38.3687	4.47753	56.3319	39.1905
0.90001	90.001	4.25566	55.5556	40.1888	4.46478	56.1739	39.3613
1.00006	100.006	4.28491	56.047	39.6681	4.52589	56.1845	39.2896
1.10006	110.006	4.38335	55.7714	39.8452	4.53475	55.7854	39.6798
1.20006	120.006	4.378	56.3675	39.2545	4.56286	56.7057	38.7315
1.30006	130.006	4.26875	54.1161	41.6151	4.54574	55.6774	39.7768
1.40006	140.006	4.43721	55.3172	40.2456	4.56193	55.2543	40.1837
1.50009	150.009	4.45884	54.9136	40.6276	4.56444	55.7906	39.6449
1.60009	160.009	4.47022	55.1901	40.3397	4.65899	55.5831	39.7579
1.70009	170.009	4.50169	54.5702	40.9281	4.66551	56.2385	39.096
1.80009	180.009	4.5355	54.6997	40.7648	4.73644	56.4522	38.8114
1.90009	190.009	4.47237	53.8144	41.7133	4.6949	55.7681	39.537

## Sheet: Ag 178-1 XPS composition
Atomic concentrations of surface
Individual measurement of three sample locations
Element	Fresh sample	Liquid side after electrolysis at -50 mA / cm-2		Average	Fresh sample	Liquid side after electrolysis at -50 mA / cm-2		Standard deviation	Fresh sample	Liquid side after electrolysis at -50 mA / cm-2
Ag / %	6.75	6.19		Ag / %	6.59	5.88		Ag / %	0.550636	0.459783
	7.17	6.22		C / %	37.9323	35.3865		C / %	2.9754	0.751095
	5.85	5.23		Ca / %	0.26	n/a		Ca / %	0.241661	n/a
C / %	42.1109	34.8848		Cl / %	0.29	n/a		Cl / %	0.0748331	n/a
	35.4141	34.8266		Cu / %	0.166667	0.16		Cu / %	0.0612826	0.0294392
	36.2719	36.4482		F / %	45.81	51.29		F / %	3.35349	0.466762
Ca / %	0.6	0		Na / %	n/a	0.286667		Na / %	n/a	0.110855
	0.12	0		O / %	4.73333	3.53667		O / %	0.51136	0.342377
	0.06	0		S / %	0.453333	n/a		S / %	0.128149	n/a
Cl / %	0.31	0		Si / %	2.38667	0.91		Si / %	0.422874	0.102307
	0.37	0		K / %	1.37436	2.55683		K / %	0.191911	0.329989
	0.19	0
Cu / %	0.24	0.2
	0.09	0.15
	0.17	0.13
F / %	41.09	50.63
	48.57	51.61
	47.77	51.63
Na / %	0	0.43
	0	0.27
	0	0.16
O / %	5.28	4.02
	4.05	3.32
	4.87	3.27
S / %	0.63	0
	0.4	0
	0.33	0
Si / %	1.84	0.9
	2.45	0.79
	2.87	1.04
K / %	1.14909	2.75523
	1.3559	2.82345
	1.61808	2.09182
Carbon bond analysis
Average	Fresh sample	Liquid side after electrolysis at -50 mA / cm-2		Standard deviation	Fresh sample	Liquid side after electrolysis at -50 mA / cm-2		Standard error	Fresh sample	Liquid side after electrolysis at -50 mA / cm-2
Ag/C	0.174678	0.166511		Ag/C	0.0196501	0.016284		Ag/C
Ag/F	0.144786	0.114692		Ag/F	0.017187	0.00949793		Ag/F
COx/C %	0.0359741	0.03965		COx/C %	0.006946	0.00214279		COx/C %	0.00401027	0.00123714
CF2/C %	0.626532	0.75747		CF2/C %	0.106651	0.00959308		CF2/C %	0.0615752	0.00553857
CR/C %	0.337493	0.20288
